# Supplementary material for: Identification of active sites in CO oxidation over a Pd/Al2O3 catalyst
Source: Royal Society of Chemistry journal article supplement (doi:10.1039/c9cp03943k), 2019-01-01
Supplement: c9cp03943k1.pdf [file c9cp03943k1.pdf]

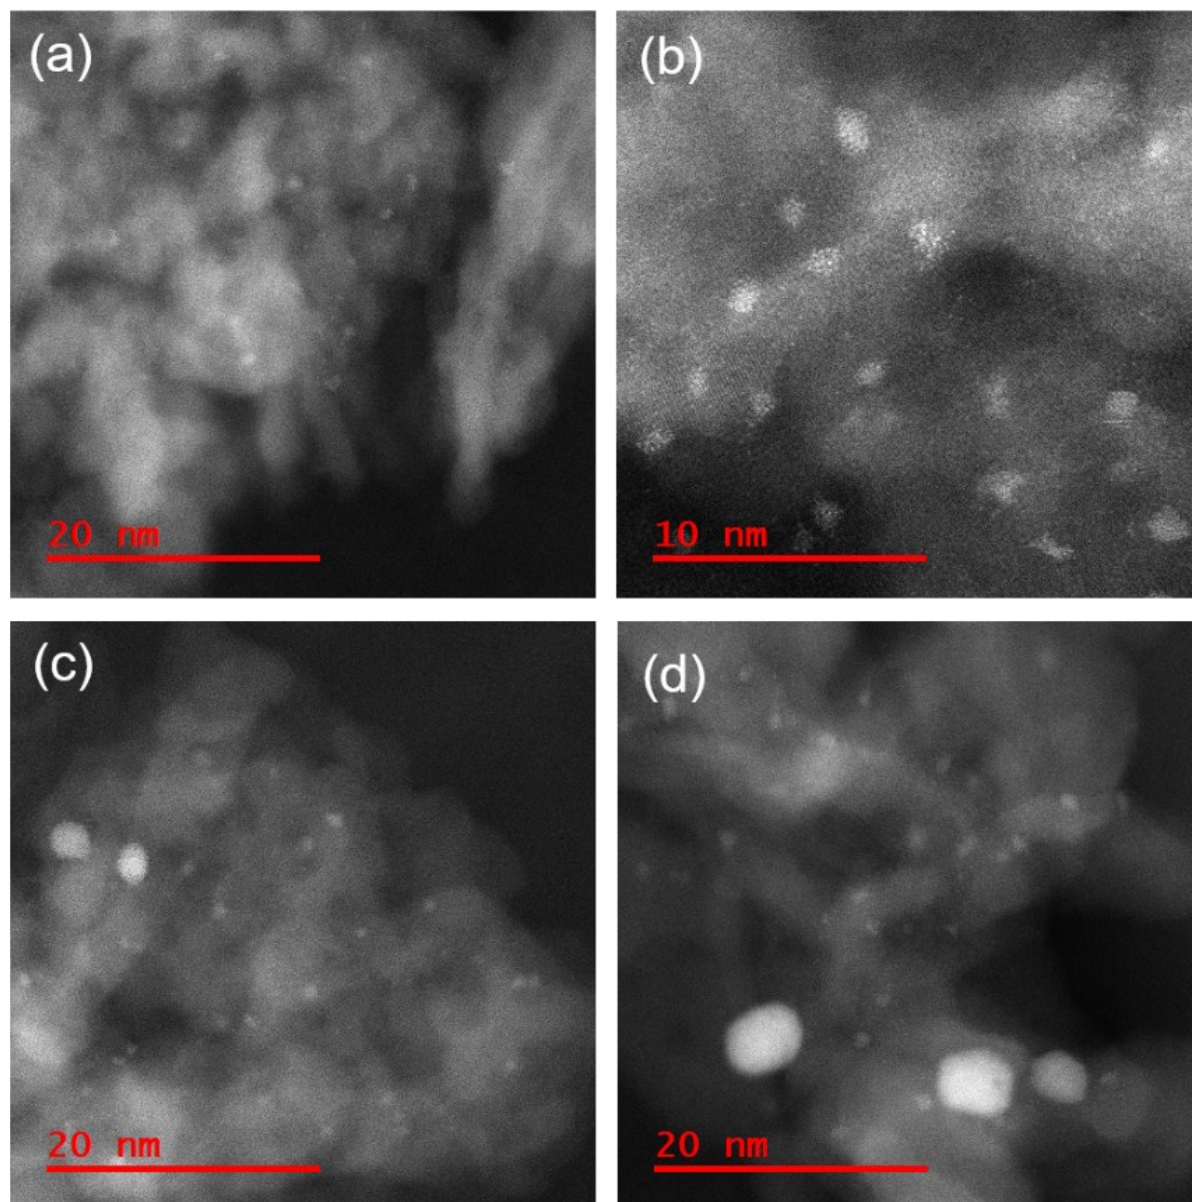

**Figure S1.** Typical Cs-STEM images of (a) 1.6 nm Pd/ $\gamma$ -Al<sub>2</sub>O<sub>3</sub>, (b) 2.6 nm Pd/ $\gamma$ -Al<sub>2</sub>O<sub>3</sub>, (c) 4.1 nm Pd/ $\gamma$ -Al<sub>2</sub>O<sub>3</sub>, and (d) 5.2 nm Pd/ $\gamma$ -Al<sub>2</sub>O<sub>3</sub>.

**Table S1.** Counted particle numbers of Pd/ $\gamma$ -Al<sub>2</sub>O<sub>3</sub> in Figure S2.

| Catalyst                                            | Counted particle number |
|-----------------------------------------------------|-------------------------|
| 1.5 nm Pd/ $\gamma$ -Al <sub>2</sub> O <sub>3</sub> | 245                     |
| 1.6 nm Pd/ $\gamma$ -Al <sub>2</sub> O <sub>3</sub> | 197                     |
| 2.2 nm Pd/ $\gamma$ -Al <sub>2</sub> O <sub>3</sub> | 370                     |
| 2.6 nm Pd/ $\gamma$ -Al <sub>2</sub> O <sub>3</sub> | 203                     |
| 4.1 nm Pd/ $\gamma$ -Al <sub>2</sub> O <sub>3</sub> | 418                     |
| 5.2 nm Pd/ $\gamma$ -Al <sub>2</sub> O <sub>3</sub> | 185                     |
| 9.0 nm Pd/ $\gamma$ -Al <sub>2</sub> O <sub>3</sub> | 147                     |

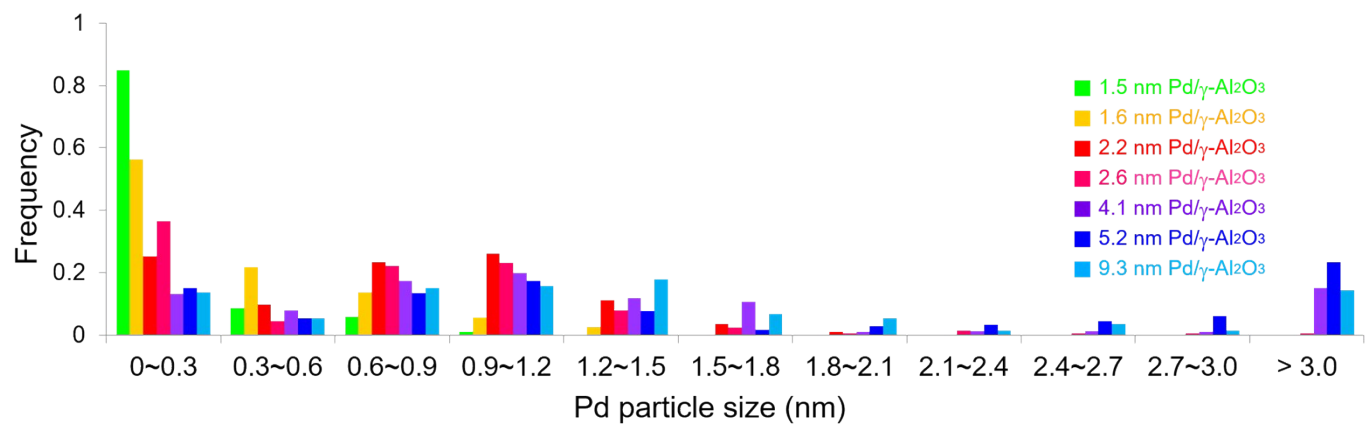

**Figure S2.** Size distributions for the number of Pd particles of various Pd/γ-Al<sub>2</sub>O<sub>3</sub> catalysts.

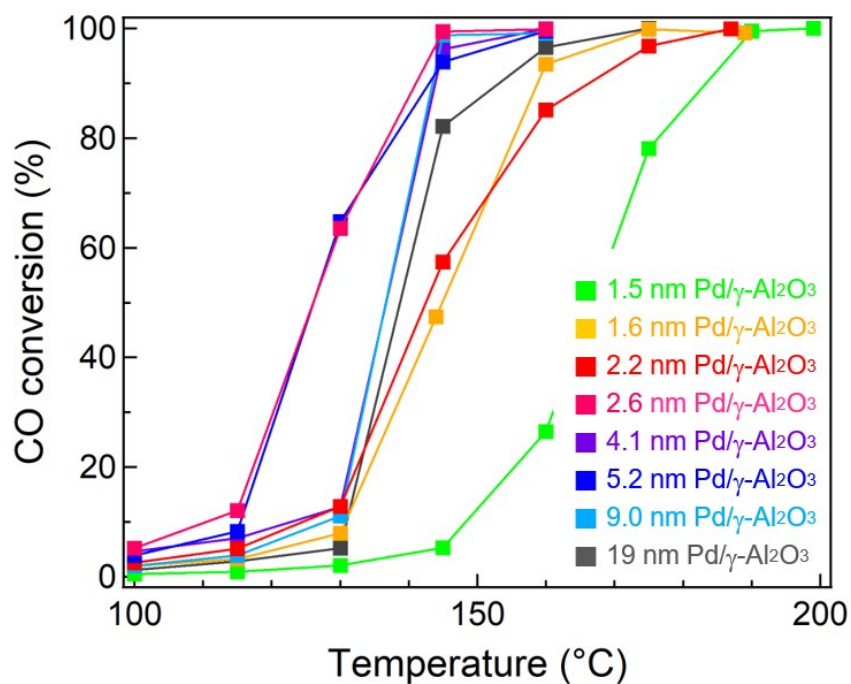

**Figure S3.** CO conversion over 10 mg of various Pd/γ-Al<sub>2</sub>O<sub>3</sub> catalysts.

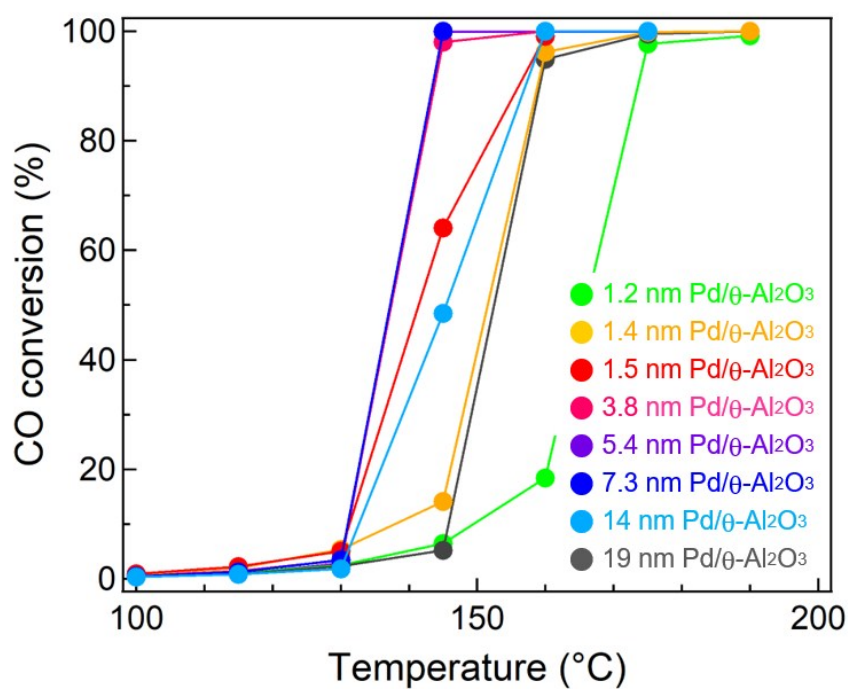

**Figure S4.** CO conversion over 10 mg of various Pd/θ-Al<sub>2</sub>O<sub>3</sub> catalysts.

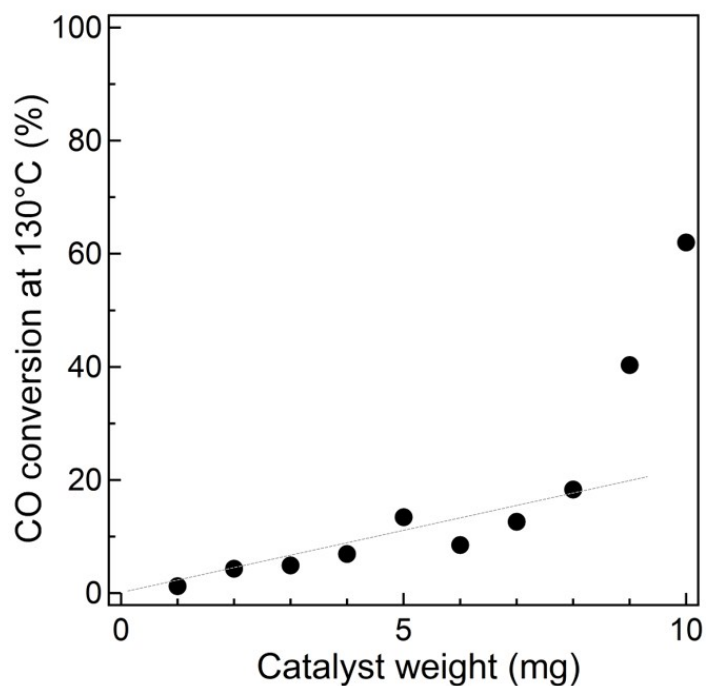

**Figure S5.** CO conversion at 130°C on various amounts of 2.2 nm Pd/ $\gamma$ -Al<sub>2</sub>O<sub>3</sub>. When the CO conversion on < 10 mg of the catalyst was evaluated, the catalyst powder was diluted with inert quartz powder to be 10 mg of powder in the tube reactor. A linear relationship between catalyst amount and CO conversion is seen on the figure in the range of < 20 % CO conversion. The data confirms that our kinetic analysis based on < 20 % CO conversion does not contain the problems due to thermal and gas diffusion effects.

**Table S2.** The list of data for TOF calculation

| Catalyst                                            | Catalyst weight <sup>a</sup><br>(mg) | Molar amount of surface Pd <sup>b</sup><br>( $\times 10^{-7}$ mol) | CO conversion<br>(%) | CO oxidation rate <sup>c</sup><br>( $\times 10^{-8}$ mol $\cdot$ s <sup>-1</sup> ) | TOF (s <sup>-1</sup> ) |
|-----------------------------------------------------|--------------------------------------|--------------------------------------------------------------------|----------------------|------------------------------------------------------------------------------------|------------------------|
| 1.5 nm Pd/ $\gamma$ -Al <sub>2</sub> O <sub>3</sub> | 10                                   | 0.66                                                               | 1.7 $\pm$ 0.2        | 0.51 $\pm$ 0.06                                                                    | 0.076 $\pm$ 0.010      |
| 1.6 nm Pd/ $\gamma$ -Al <sub>2</sub> O <sub>3</sub> | 10                                   | 1.34                                                               | 6.0 $\pm$ 1.3        | 1.79 $\pm$ 0.38                                                                    | 0.134 $\pm$ 0.028      |
| 2.2 nm Pd/ $\gamma$ -Al <sub>2</sub> O <sub>3</sub> | 10                                   | 2.53                                                               | 15.1 $\pm$ 2.7       | 4.49 $\pm$ 0.80                                                                    | 0.177 $\pm$ 0.032      |
| 2.6 nm Pd/ $\gamma$ -Al <sub>2</sub> O <sub>3</sub> | 2                                    | 0.85                                                               | 3.8 $\pm$ 0.4        | 1.12 $\pm$ 0.11                                                                    | 0.133 $\pm$ 0.013      |
| 4.1 nm Pd/ $\gamma$ -Al <sub>2</sub> O <sub>3</sub> | 2                                    | 1.03                                                               | 4.4 $\pm$ 2.6        | 1.30 $\pm$ 0.79                                                                    | 0.079 $\pm$ 0.010      |
| 5.2 nm Pd/ $\gamma$ -Al <sub>2</sub> O <sub>3</sub> | 2                                    | 0.90                                                               | 3.0 $\pm$ 0.9        | 0.90 $\pm$ 0.26                                                                    | 0.100 $\pm$ 0.028      |
| 9.0 nm Pd/ $\gamma$ -Al <sub>2</sub> O <sub>3</sub> | 10                                   | 2.35                                                               | 8.5 $\pm$ 1.7        | 2.52 $\pm$ 0.52                                                                    | 0.107 $\pm$ 0.022      |
| 19 nm Pd/ $\gamma$ -Al <sub>2</sub> O <sub>3</sub>  | 10                                   | 1.11                                                               | 5.2                  | 1.55                                                                               | 0.140                  |
| 1.2 nm Pd/ $\theta$ -Al <sub>2</sub> O <sub>3</sub> | 10                                   | 0.91                                                               | 2.5                  | 0.74                                                                               | 0.081                  |
| 1.4 nm Pd/ $\theta$ -Al <sub>2</sub> O <sub>3</sub> | 10                                   | 1.56                                                               | 5.4                  | 1.61                                                                               | 0.103                  |
| 1.5 nm Pd/ $\theta$ -Al <sub>2</sub> O <sub>3</sub> | 10                                   | 3.42                                                               | 5.0                  | 1.49                                                                               | 0.044                  |
| 3.8 nm Pd/ $\theta$ -Al <sub>2</sub> O <sub>3</sub> | 10                                   | 2.74                                                               | 3.4                  | 1.01                                                                               | 0.037                  |
| 5.4 nm Pd/ $\theta$ -Al <sub>2</sub> O <sub>3</sub> | 2.5                                  | 0.99                                                               | 0.9                  | 0.28                                                                               | 0.028                  |
| 7.3 nm Pd/ $\theta$ -Al <sub>2</sub> O <sub>3</sub> | 10                                   | 2.89                                                               | 3.5                  | 1.04                                                                               | 0.036                  |
| 14 nm Pd/ $\theta$ -Al <sub>2</sub> O <sub>3</sub>  | 10                                   | 1.47                                                               | 1.8                  | 0.54                                                                               | 0.037                  |
| 19 nm Pd/ $\theta$ -Al <sub>2</sub> O <sub>3</sub>  | 10                                   | 1.09                                                               | 2.3                  | 0.68                                                                               | 0.063                  |

<sup>a</sup>Catalyst weight used to evaluate the TOF. <sup>b</sup>Molar amount of surface Pd (mol) was defined as (molar amount of Pd atom (mol)) / (Pd dispersion (%) / 100). <sup>c</sup>CO oxidation rate (mol $\cdot$ s<sup>-1</sup>) was defined as (flow rate of CO molecule (mol $\cdot$ s<sup>-1</sup>))  $\times$  (CO conversion (%) / 100)

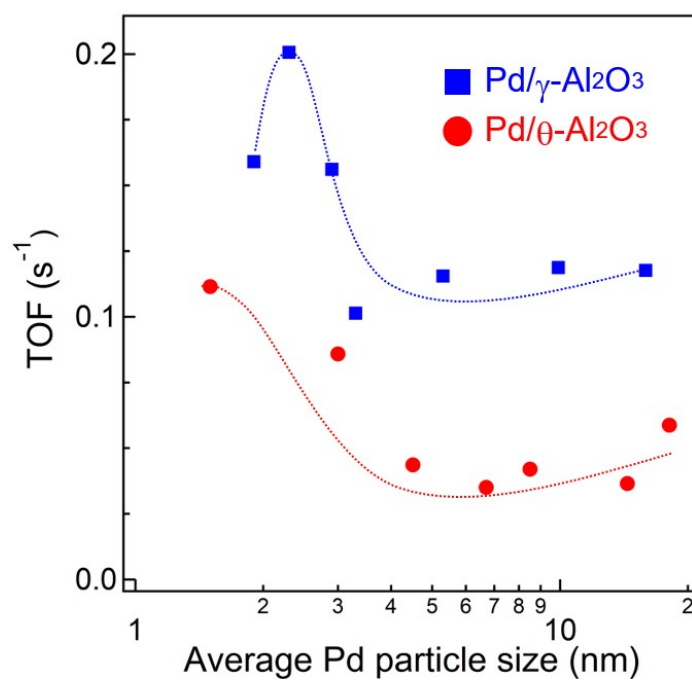

**Figure S6.** Dependence of TOF at 130°C on average Pd particle size estimated from H<sub>2</sub> pulse chemisorption. The 0.1wt% Pd/Al<sub>2</sub>O<sub>3</sub> with high fraction of the isolated were excluded.

**Table S3.** The ratios of the IR band area of various CO species on Pd/Al<sub>2</sub>O<sub>3</sub> catalysts.

| Catalyst                                            | Linear adsorbed<br>CO on Pd <sup>+</sup><br>(2200-2100 cm <sup>-1</sup> ) | Linear adsorbed<br>CO on Pd <sup>0</sup><br>(2100-2000 cm <sup>-1</sup> ) | Bridge adsorbed<br>CO on Pd step<br>(2000-1960 cm <sup>-1</sup> ) | Bridge adsorbed<br>CO on plane<br>(1960-1700 cm <sup>-1</sup> ) |
|-----------------------------------------------------|---------------------------------------------------------------------------|---------------------------------------------------------------------------|-------------------------------------------------------------------|-----------------------------------------------------------------|
| 1.5 nm Pd/ $\gamma$ -Al <sub>2</sub> O <sub>3</sub> | 0.30                                                                      | 0.40                                                                      | 0.00                                                              | 0.30                                                            |
| 1.6 nm Pd/ $\gamma$ -Al <sub>2</sub> O <sub>3</sub> | 0.09                                                                      | 0.44                                                                      | 0.00                                                              | 0.47                                                            |
| 2.2 nm Pd/ $\gamma$ -Al <sub>2</sub> O <sub>3</sub> | 0.01                                                                      | 0.45                                                                      | 0.00                                                              | 0.55                                                            |
| 2.6 nm Pd/ $\gamma$ -Al <sub>2</sub> O <sub>3</sub> | 0.05                                                                      | 0.33                                                                      | 0.00                                                              | 0.63                                                            |
| 4.1 nm Pd/ $\gamma$ -Al <sub>2</sub> O <sub>3</sub> | 0.00                                                                      | 0.22                                                                      | 0.01                                                              | 0.77                                                            |
| 5.2 nm Pd/ $\gamma$ -Al <sub>2</sub> O <sub>3</sub> | 0.00                                                                      | 0.23                                                                      | 0.02                                                              | 0.76                                                            |
| 9.0 nm Pd/ $\gamma$ -Al <sub>2</sub> O <sub>3</sub> | 0.00                                                                      | 0.19                                                                      | 0.07                                                              | 0.73                                                            |
| 19 nm Pd/ $\gamma$ -Al <sub>2</sub> O <sub>3</sub>  | 0.00                                                                      | 0.28                                                                      | 0.09                                                              | 0.63                                                            |
| 1.2 nm Pd/ $\theta$ -Al <sub>2</sub> O <sub>3</sub> | 0.03                                                                      | 0.37                                                                      | 0.00                                                              | 0.60                                                            |
| 1.4 nm Pd/ $\theta$ -Al <sub>2</sub> O <sub>3</sub> | 0.01                                                                      | 0.45                                                                      | 0.00                                                              | 0.53                                                            |
| 1.5 nm Pd/ $\theta$ -Al <sub>2</sub> O <sub>3</sub> | 0.00                                                                      | 0.24                                                                      | 0.00                                                              | 0.76                                                            |
| 3.8 nm Pd/ $\theta$ -Al <sub>2</sub> O <sub>3</sub> | 0.00                                                                      | 0.09                                                                      | 0.18                                                              | 0.73                                                            |
| 5.4 nm Pd/ $\theta$ -Al <sub>2</sub> O <sub>3</sub> | 0.00                                                                      | 0.06                                                                      | 0.21                                                              | 0.72                                                            |
| 7.3 nm Pd/ $\theta$ -Al <sub>2</sub> O <sub>3</sub> | 0.00                                                                      | 0.05                                                                      | 0.20                                                              | 0.76                                                            |
| 14 nm Pd/ $\theta$ -Al <sub>2</sub> O <sub>3</sub>  | 0.00                                                                      | 0.15                                                                      | 0.15                                                              | 0.70                                                            |
| 19 nm Pd/ $\theta$ -Al <sub>2</sub> O <sub>3</sub>  | 0.00                                                                      | 0.22                                                                      | 0.15                                                              | 0.63                                                            |

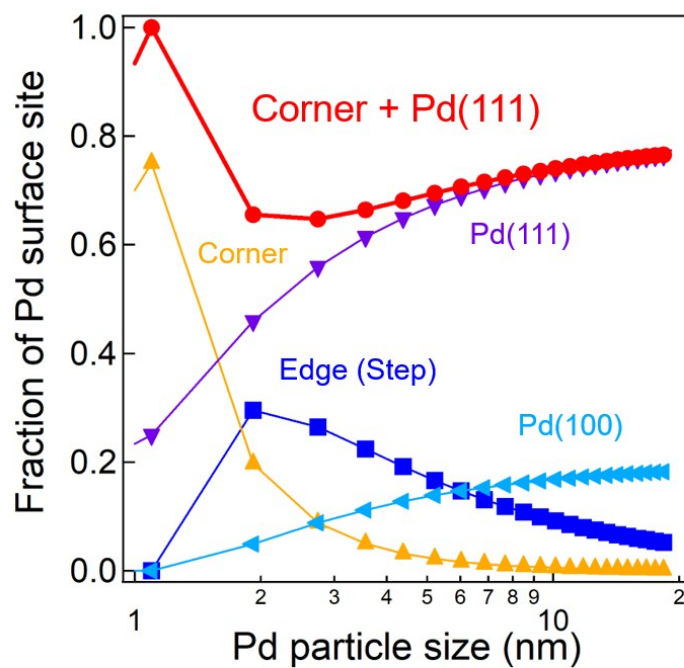

**Figure S7.** Particle size dependence of fraction of corner site and Pd(111) (●) and corner site (▲), Pd(111) (▼), Pd(100) (◄), edge site (or step) (■). We assumed a cubo-octahedron as a tentative model particle.



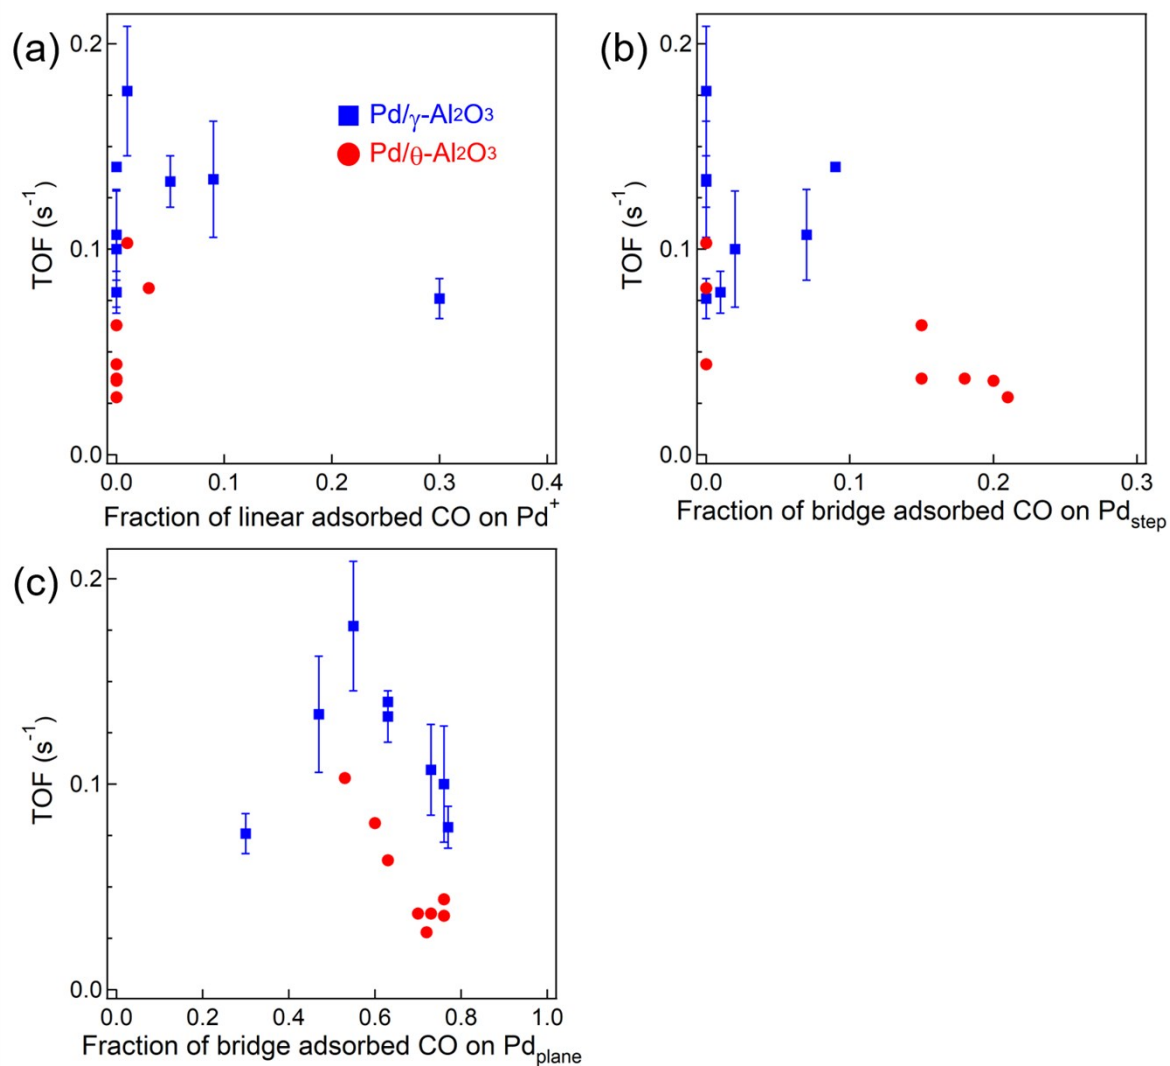

**Figure S8.** Plot of TOFs (at 130°C) against the fraction of (a) linear adsorbed CO on  $\text{Pd}^+$ , (b) bridge adsorbed CO on step site and (c) linear adsorbed CO on plane.

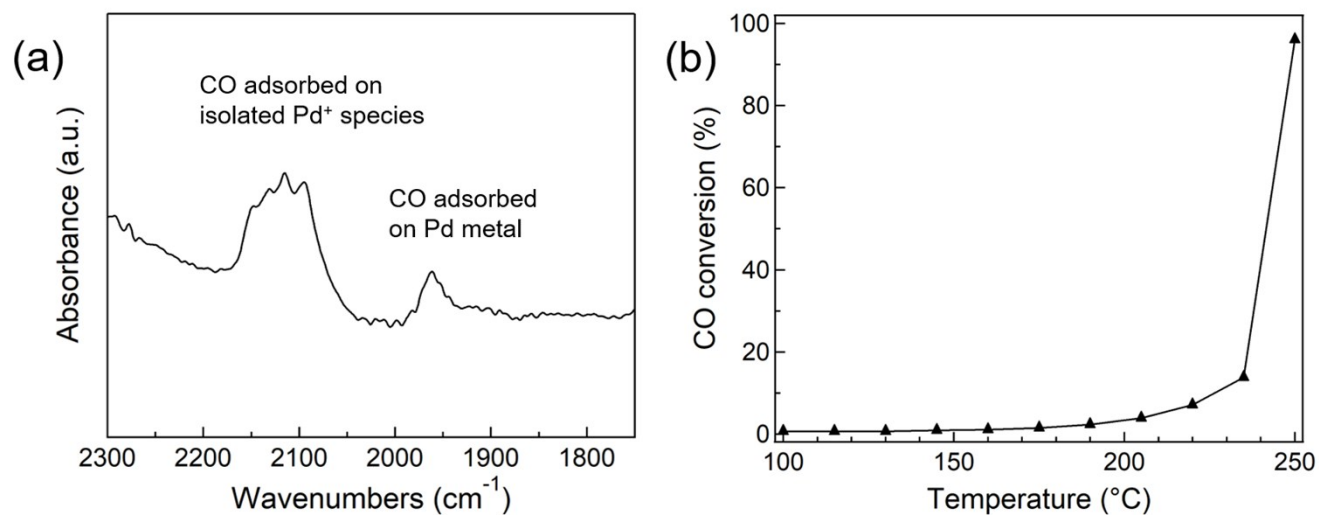

**Figure S9.** (a) IR spectra of adsorbed CO on Pd/ZSM-5. (b) The CO conversion of Pd/ZSM-5 as a function of temperature.

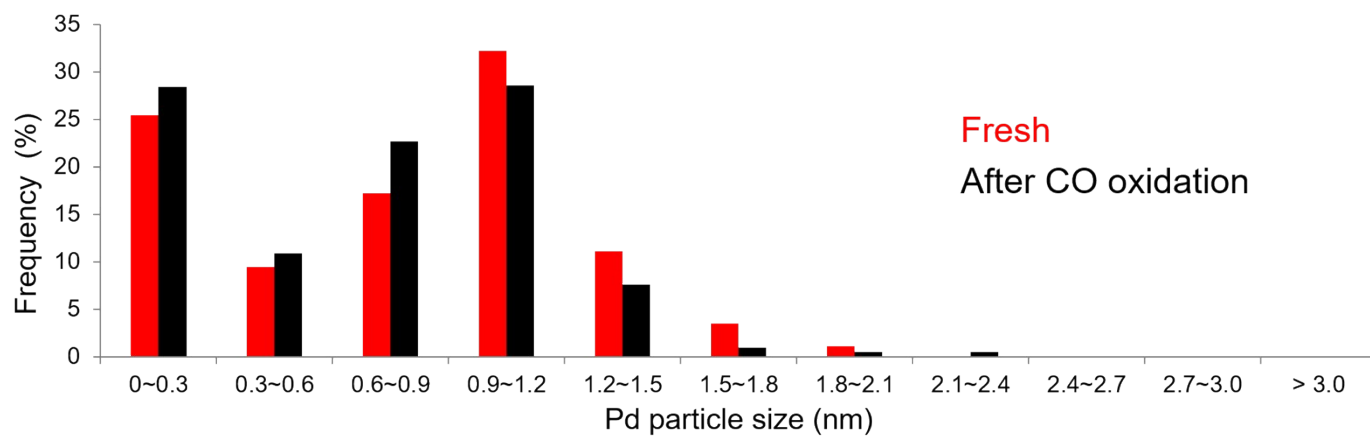

**Figure S10.** Size distributions for the number of Pd particles of 2.2 nm Pd/ $\gamma$ -Al<sub>2</sub>O<sub>3</sub> catalyst after prereduction by H<sub>2</sub> (red) and CO oxidation reaction at 130°C (black).

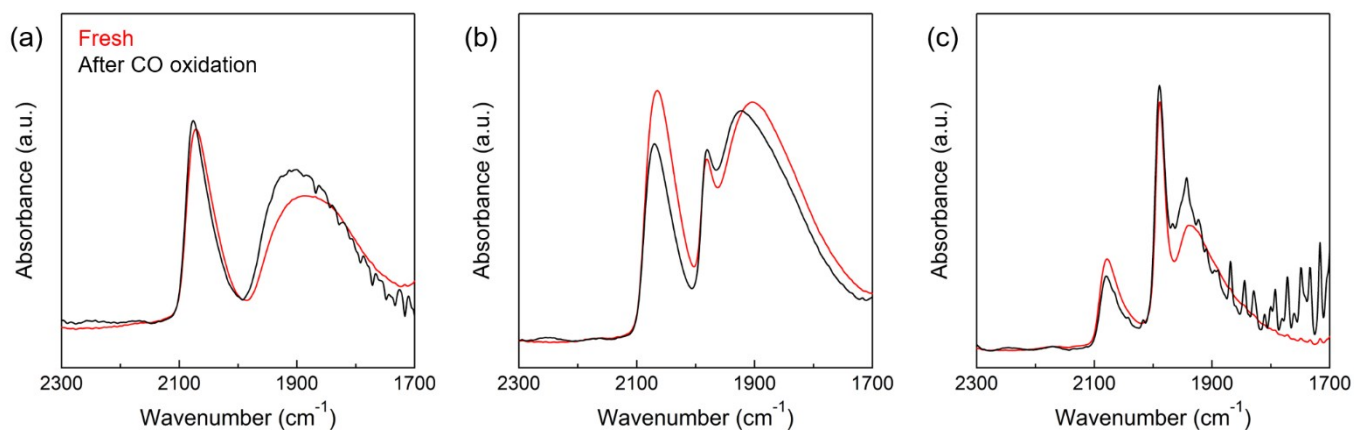

**Figure S11.** IR spectra of adsorbed CO on (a) 2.2 nm Pd/ $\gamma$ - $\text{Al}_2\text{O}_3$  and (b) 4.1 nm Pd/ $\gamma$ - $\text{Al}_2\text{O}_3$ , (c) 5.4 nm Pd/ $\theta$ - $\text{Al}_2\text{O}_3$  after prereduction by  $\text{H}_2$  (red) and CO oxidation at 130°C (black).

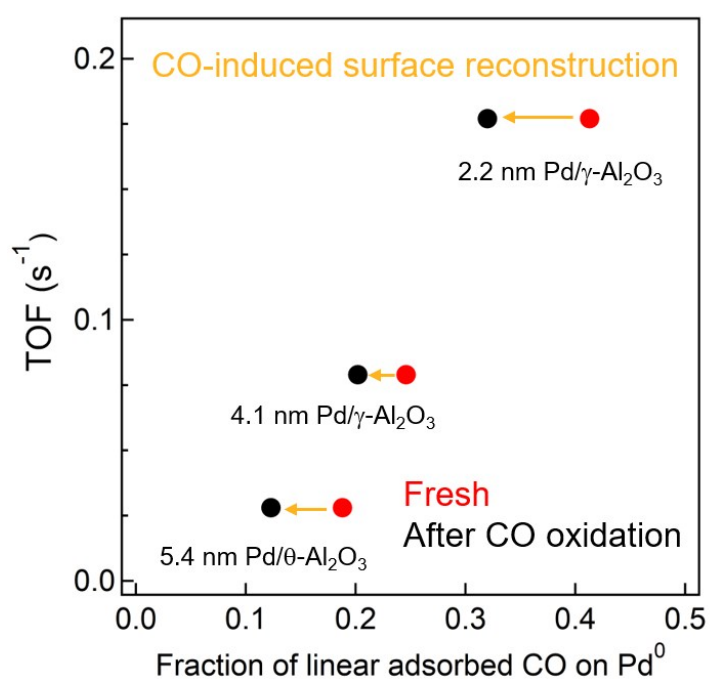

**Figure S12.** Plot of TOFs (at 130°C) against the fraction of linear adsorbed CO on  $\text{Pd}^0$  for Pd/ $\text{Al}_2\text{O}_3$  after prereduction by  $\text{H}_2$  (red) and CO oxidation (black).

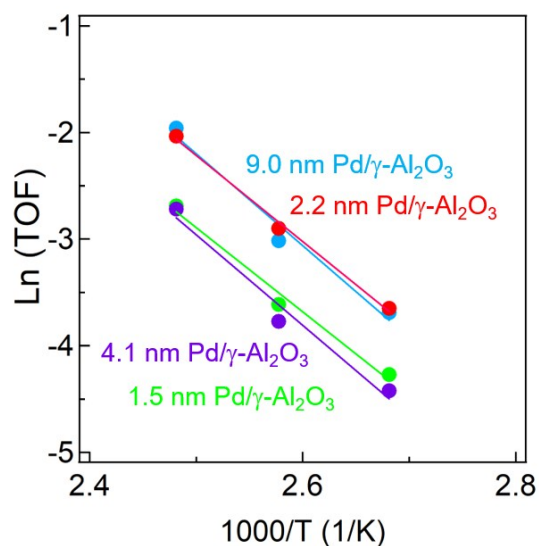

**Figure S13.** The dependence of TOFs on temperature for CO oxidation over Pd/γ-Al<sub>2</sub>O<sub>3</sub>.

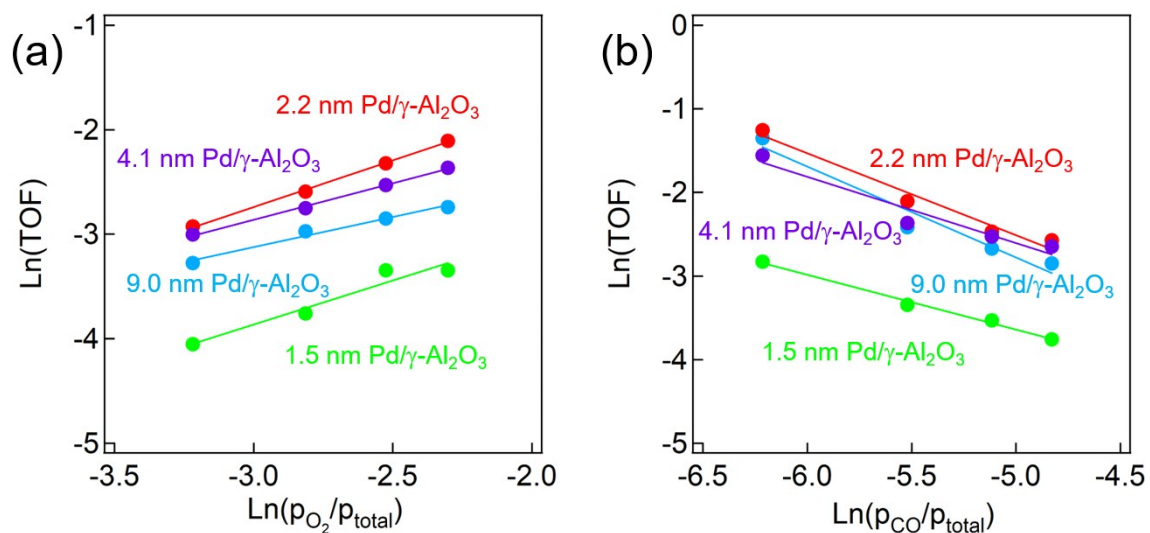

**Figure S14.** The dependence of TOFs on partial pressure of (a) O<sub>2</sub> and (b) CO for CO oxidation over Pd/γ-Al<sub>2</sub>O<sub>3</sub>.

**Table S4.** The apparent activation energy ( $E_a$ ) and the reaction order for CO oxidation over Pd/γ-Al<sub>2</sub>O<sub>3</sub>.

| Catalyst                                   | $E_a$ (kJ mol <sup>-1</sup> ) | Reaction order of O <sub>2</sub> | Reaction order of CO |
|--------------------------------------------|-------------------------------|----------------------------------|----------------------|
| 1.5 nm Pd/γ-Al <sub>2</sub> O <sub>3</sub> | 66±8                          | 0.84±0.15                        | -0.66±0.04           |
| 2.2 nm Pd/γ-Al <sub>2</sub> O <sub>3</sub> | 66±7                          | 0.89±0.02                        | -0.98±0.12           |
| 4.1 nm Pd/γ-Al <sub>2</sub> O <sub>3</sub> | 71±11                         | 0.69±0.03                        | -0.79±0.15           |
| 9.0 nm Pd/γ-Al <sub>2</sub> O <sub>3</sub> | 72±11                         | 0.58±0.06                        | -1.08±0.18           |

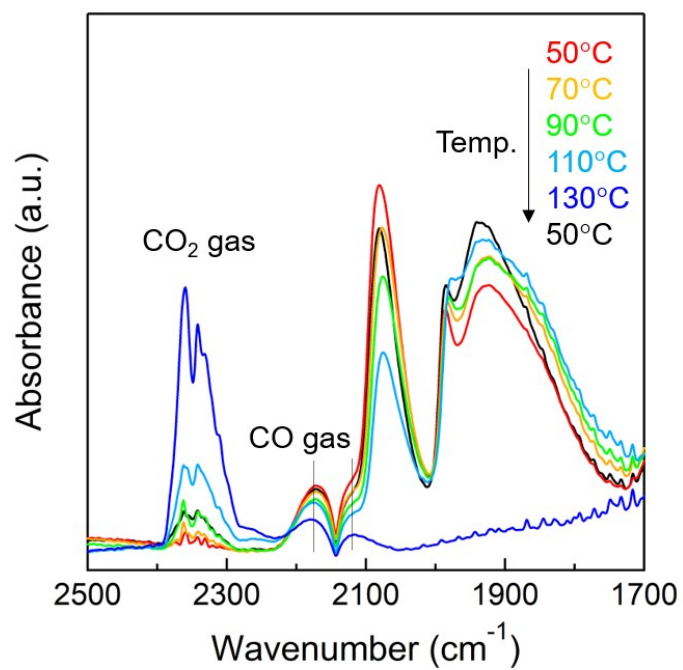

**Figure S15.** IR spectra of adsorbed CO on 4.1 nm Pd/ $\gamma$ -Al<sub>2</sub>O<sub>3</sub> measured under a flow of gaseous mixtures (0.4% CO, 10% O<sub>2</sub>, Ar balance, 100 mL/min) at various temperatures.
